# Supplementary material
Source: PubMed Central journal article supplement (PMC4038544)
Supplement: NIHMS580801-supplement-Supplemental_information.pdf [file NIHMS580801-supplement-Supplemental_information.pdf]

## SUPPLEMENTAL INFORMATION

### **Methods and Materials**

#### CELL CULTURE

MDA-MB-231, a human breast cancer cell line, was obtained from the American Type Culture Collection. The cells were cultured in Dulbecco's Modified Eagle Medium (DMEM) containing penicillin (50 U/ml), streptomycin (50 µg/ml), and glutamine (1 mg/ml), and supplemented with 10% fetal bovine serum, and maintained under a moist 5%-CO<sub>2</sub>/95%-air atmosphere and fresh medium exchanged every 2 days. Confluent cells were washed twice with phosphate-buffered saline (PBS, pH 7.4) and harvested by a brief incubation in PBS with a trypsin-EDTA solution (Sigma Aldrich).

#### COLLECTION OF CONDITIONED CELL-CULTURE MEDIUM (CM)

MDA- MB-231 cells were grown to 80% confluence in DMEM medium supplemented with 10% fetal bovine serum, then washed in serum-free medium three times and incubated in serum-free medium for 18 hours. The CM was centrifuged to remove any cellular debris; and then concentrated through a centrifugal filter (3000 MW cut off, Millipore, USA). The protein concentrated of the sample was determined and then stored at -80 °C until use.

#### IMMUNOBLOTTING

Protein samples (10 µg or 20 µg from interstitial fluids, 2 µg from sera) were subjected to SDS-PAGE electrophoresis. Proteins were transferred to a polyvinylidene fluoride membrane and immunoblotted with a polyclonal antibody against carboxypeptidase N subunit 2 (Anti-CPN,

1:200, Abcam, USA). The signal was detected by chemiluminescence using the Pierce ECL Western Blotting kit (Thermo Scientific, Rockford, IL, USA).

## IMMUNOHISTOCHEMISTRY

Paraffin-embedded tissue (normal or diseased) was cut into 4- $\mu$ m sections and adhered onto glass slides. The human breast tissue sections already prepared on glass slides were obtained commercially (BC081116a, US BioMax, Rockville, MD). The paraffin in these sections was removed with xylenes, and the samples were rehydrated by changing alcohols with distilled water in step-wise and automated fashion using the Shandon-Lipshaw Varistain (Pittsburgh, PA, USA). The sections were incubated at 90 °C for 10 min in 10 mmol/L citrate buffer, pH 6.0. The anti-CPN polyclonal antibody (Abcam) was applied at a 1:20 dilution in 1% bovine serum albumin. The degree of staining was evaluated by a pathologist, according to the method reported by Zhang et al. (31).

## BLOOD SAMPLE COLLECTION FROM HUMAN

Blood samples were collected from healthy women without a history of breast cancer (i.e., non-breast cancer or otherwise “healthy”) (36 to 85 years old) and from breast cancer patients (44 to 88 years old) diagnosed with breast cancer at different pathological stages (Table S2), who were enrolled at the University of Texas MD Anderson Cancer Center (MDACC). All participants signed an informed consent form allowing banking of their blood samples for future research. The banking protocol and a protocol describing this research were approved by the MDACC Institutional Review and Privacy Board. Details on patient age and pathologic diagnosis are given in Table S1. From each patient or control individual, 10 mL of whole blood were collected

in plain tubes containing EDTA (Sarstedt, Newton, NC). The specimens were centrifuged at 20 °C for 10 min at 3000 × g, after which the plasma was removed, divided into aliquots, and stored at –80 °C until further use.

#### ANALYSIS BY MALDI-TOF MS

Each sample (0.5 µl) eluted from the NPS chip was spotted on the MALDI plate and allowed to dry completely, followed by spotting 0.5 µl of the matrix solution (4 g/l of  $\alpha$ -cyano-4-hydroxycinnamic acid in a 50% ACN and 0.1% trifluoroacetic acid solution) on top of each sample. After the matrix has crystallized, the plate was subjected to the Applied Biosystems 4700 Proteomics Analyzer (Framingham, MA), operating in positive ion (ion source) and reflective (detector) modes.

#### ANALYSIS BY HIGH-PERFORMANCE LIQUID CHROMATOGRAPHY-TANDEM MASS SPECTROMETRY (HPLC–MS/MS)

HPLC-MS/MS was processed by the Orbitrap-XL mass spectrometer (Thermo Scientific, Waltham MA) coupled with an Agilent 1200 series HPLC system (Santa Clara, CA). The mobile phases used for LC analysis were (A) 0.1% formic acid in water and (B) 0.1% formic acid in ACN. Flow rate was 0.4 µl/min. MS conditions included a voltage of 2.9 kV for electrospray ionization, an isolation window for MS/MS of 3, relative collision energy of 35%, and a scan strategy of 1 Fourier Transform Mass Spectrometer (FTMS) scan followed by 3 MS/MS product ion scans. Spectra were searched against the SwissProt protein database using Mascot (v 2.3, Matrix Science, London, UK) or Sequest (Thermo Scientific). Search parameters included no

enzyme, mass tolerances of  $\pm 15$  ppm for precursors and  $\pm 0.8$  Da for fragments, and variable modifications (oxidation of methionine and deamidation of asparagine and/or glutamine).

**Table S1. Circulating peptides resulting from the cleavage of the C-terminal arginine by CPN in human plasma and mouse serum.**

| Peptide name                             | Peptide sequence   | m/z     | Protein       | Species |
|------------------------------------------|--------------------|---------|---------------|---------|
| C3f_R <sub>1310</sub> -L <sub>1319</sub> | RIHWESASLL         | 1211.65 | Complement C3 | Human   |
| C3f_R <sub>1309</sub> -L <sub>1319</sub> | HRIHWESASLL        | 1348.70 |               |         |
| C3f_R <sub>1308</sub> -L <sub>1319</sub> | THRIHWESASLL       | 1449.80 |               |         |
| C3f_R <sub>1305</sub> -L <sub>1319</sub> | SKITHRIHWESASLL    | 1777.96 |               |         |
| C3f_R <sub>1304</sub> -L <sub>1319</sub> | SSKITHRIHWESASLL   | 1864.98 |               |         |
| BK <sub>8</sub>                          | RPPGFSPF           | 904.48  | Bradykinin    |         |
| C3f_R <sub>1310</sub> -L <sub>1319</sub> | RLLWENGNULL        | 1227.68 | Complement C3 | Mouse   |
| C3f_R <sub>1309</sub> -L <sub>1319</sub> | FR LLWENGNULL      | 1374.75 |               |         |
| C3f_R <sub>1308</sub> -L <sub>1319</sub> | TFR LLWENGNULL     | 1475.80 |               |         |
| C3f_R <sub>1307</sub> -L <sub>1319</sub> | TTFR LLWENGNULL    | 1576.84 |               |         |
| C3f_R <sub>1304</sub> -L <sub>1319</sub> | SSATTFR LLWENGNULL | 1821.95 |               |         |
| BK <sub>8</sub>                          | RPPGFSPF           | 904.48  | Bradykinin    |         |

**Table S2. Clinical information of the human plasma samples from healthy women and from patients diagnosed with breast cancer at different pathological stages. NOS, not otherwise specified.**

| <b>Woman plasma ID</b> | <b>Stage at Sample Collection</b> | <b>Age at Sample Collection</b> | <b>Note</b>                     |
|------------------------|-----------------------------------|---------------------------------|---------------------------------|
| 1                      | x                                 | 36                              | x                               |
| 8                      | x                                 | 42                              | x                               |
| 4                      | x                                 | 44                              | x                               |
| 10                     | x                                 | 50                              | x                               |
| 3                      | x                                 | 61                              | x                               |
| 5                      | x                                 | 61                              | x                               |
| 7                      | x                                 | 64                              | x                               |
| 9                      | x                                 | 68                              | x                               |
| 6                      | x                                 | 72                              | x                               |
| 2                      | x                                 | 85                              | x                               |
| 11                     | I                                 | 61                              | Invasive Ductal Carcinoma, NOS  |
| 12                     | I                                 | 50                              | Invasive Ductal Carcinoma, NOS  |
| 13                     | I                                 | 62                              | Invasive Ductal Carcinoma, NOS  |
| 14                     | I                                 | 47                              | Invasive Lobular Carcinoma, NOS |
| 15                     | I                                 | 88                              | Invasive Mixed Ductal / Lobular |
| 16                     | I                                 | 45                              | Invasive Ductal Carcinoma, NOS  |
| 17                     | I                                 | 64                              | Invasive Ductal Carcinoma, NOS  |
| 18                     | I                                 | 49                              | Invasive Ductal Carcinoma, NOS  |
| 19                     | I                                 | 65                              | Invasive Ductal Carcinoma, NOS  |
| 20                     | I                                 | 64                              | Invasive Lobular Carcinoma, NOS |
| 21                     | I                                 | 36                              | Invasive Ductal Carcinoma, NOS  |
| 22                     | IIA                               | 52                              | Invasive Ductal Carcinoma, NOS  |
| 23                     | IIA                               | 45                              | Invasive Ductal Carcinoma, NOS  |
| 24                     | IIA                               | 45                              | Invasive Ductal Carcinoma, NOS  |
| 25                     | IIA                               | 56                              | Invasive Ductal Carcinoma, NOS  |
| 26                     | IIA                               | 86                              | Invasive Lobular Carcinoma, NOS |
| 27                     | IIA                               | 63                              | Invasive Ductal Carcinoma, NOS  |
| 28                     | IIB                               | 74                              | Invasive Mixed Ductal / Lobular |
| 29                     | IIB                               | 58                              | Invasive Ductal Carcinoma, NOS  |
| 30                     | IIB                               | 53                              | Invasive Ductal Carcinoma, NOS  |
| 31                     | IIB                               | 44                              | Invasive Ductal Carcinoma, NOS  |
| 32                     | IIB                               | 42                              | Invasive Ductal Carcinoma, NOS  |
| 33                     | IIIA                              | 61                              | Invasive Ductal Carcinoma, NOS  |
| 34                     | IIIA                              | 67                              | Invasive Lobular Carcinoma, NOS |
| 35                     | IIIA                              | 66                              | Invasive Ductal Carcinoma, NOS  |
| 36                     | IIIB                              | 65                              | Invasive Ductal Carcinoma, NOS  |
| 37                     | IIIB                              | 64                              | Invasive Ductal Carcinoma, NOS  |
| 38                     | IIIB                              | 42                              | Invasive Ductal Carcinoma, NOS  |
| 39                     | IIIC                              | 62                              | Invasive Lobular Carcinoma, NOS |
| 40                     | IIIC                              | 42                              | Invasive Ductal Carcinoma, NOS  |
| 41                     | IIIC                              | 43                              | Invasive Ductal Carcinoma, NOS  |
| 42                     | IIIC                              | 42                              | Invasive Lobular Carcinoma, NOS |
| 43                     | IIIC                              | 41                              | Invasive Ductal Carcinoma, NOS  |
| 44                     | IIIC                              | 38                              | Invasive Ductal Carcinoma, NOS  |
| 45                     | IIIC                              | 75                              | Invasive Ductal Carcinoma, NOS  |
| 46                     | IIIC                              | 78                              | Invasive Lobular Carcinoma, NOS |
| 47                     | IV                                | 76                              | Invasive Ductal Carcinoma, NOS  |
| 48                     | IV                                | 73                              | Invasive Ductal Carcinoma, NOS  |
| 49                     | IV                                | 48                              | Invasive Mixed Ductal / Lobular |
| 50                     | IV                                | 58                              | Invasive Ductal Carcinoma, NOS  |
| 51                     | IV                                | 65                              | Invasive Ductal Carcinoma, NOS  |
| 52                     | IV                                | 76                              | Invasive Mixed Ductal / Lobular |
| 53                     | IV                                | 48                              | Invasive Ductal Carcinoma, NOS  |
| 54                     | IV                                | 75                              | Invasive Lobular Carcinoma, NOS |
| 55                     | IV                                | 70                              | Invasive Lobular Carcinoma, NOS |
| 56                     | IV                                | 72                              | Invasive Ductal Carcinoma, NOS  |
| 57                     | IV                                | 67                              | Invasive Lobular Carcinoma, NOS |
| 58                     | IV                                | 73                              | Invasive Mixed Ductal / Lobular |

Figure S1

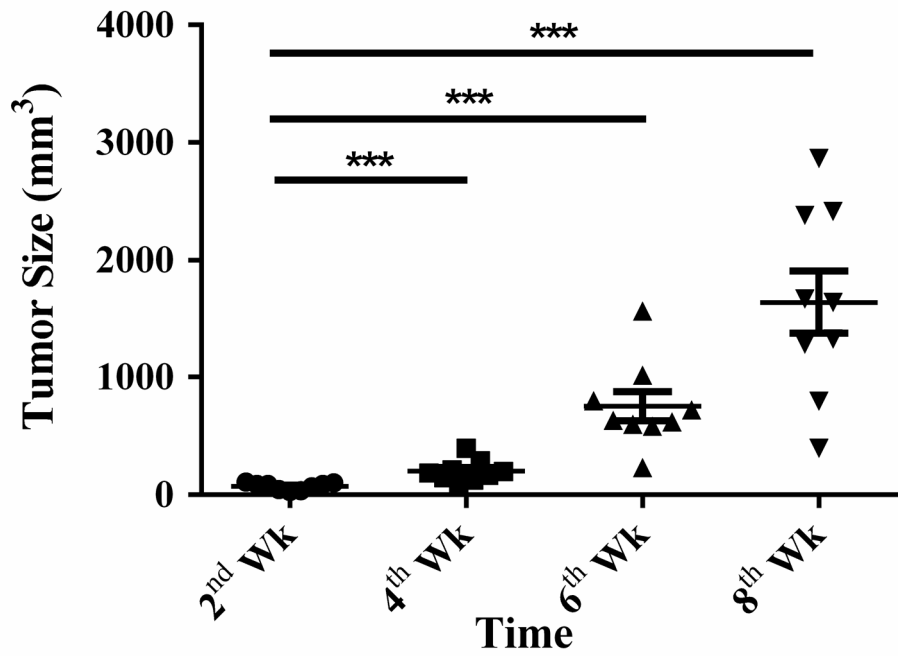

**Figure S1. Dot plot for the tumor sizes versus time in breast cancer mouse model.** Mouse number: n=8; Student's t-test, \*\* p<0.01, \*\*\* p<0.001.

Figure S2

A

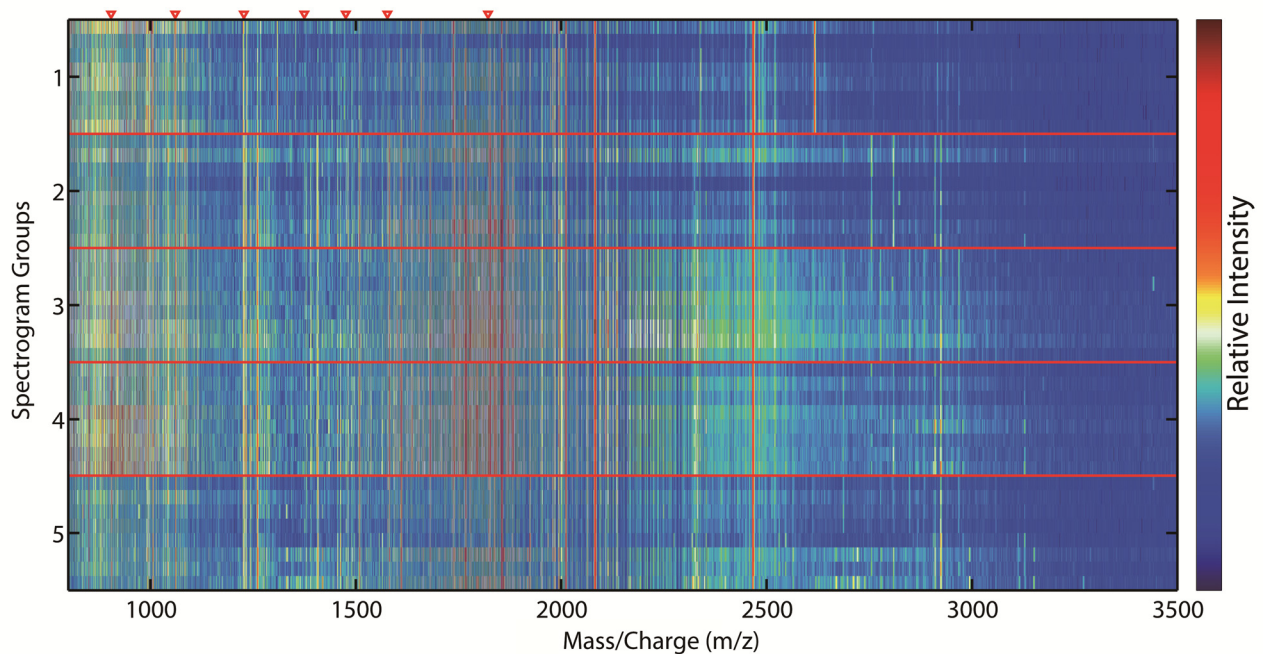

B

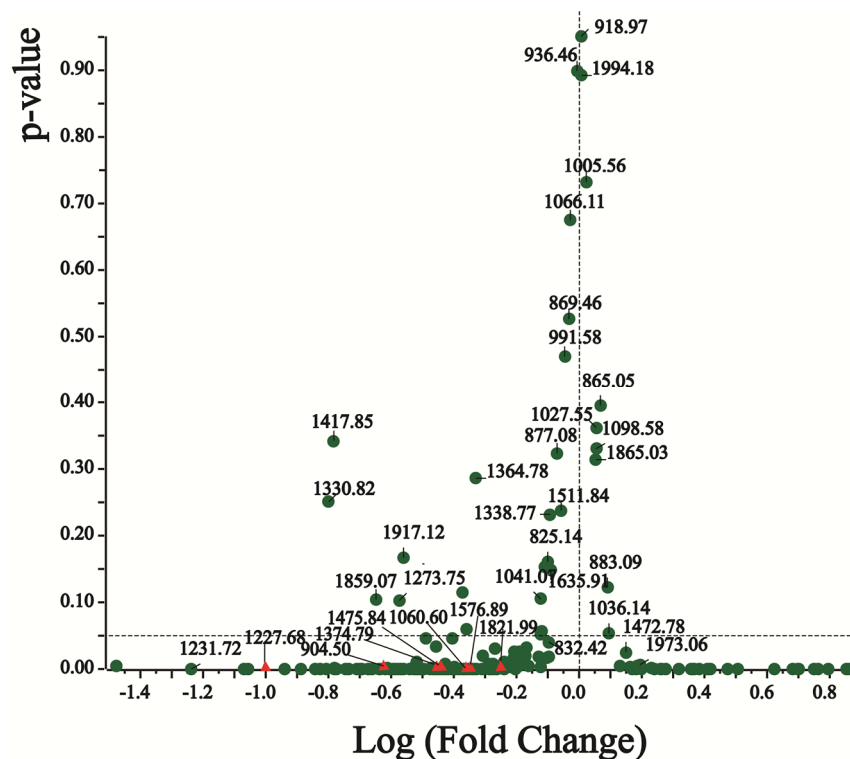

**Figure S2. Heat map and dot plot for analysis of the MALDI-TOF MS spectra on circulating peptides from breast cancer mouse model.**

**A.** Heat map. Spectrum group 1-5 indicate the five time points of the blood collection from mice at 0, 2<sup>nd</sup>, 4<sup>th</sup>, 6<sup>th</sup>, 8<sup>th</sup> week, respectively. n=8/group. **B.** Dot plot (p-value versus log(fold change)). Student's t-test was processed on MALDI-TOF MS spectra collected from mouse sera (Group: 0, 2<sup>nd</sup>, 4<sup>th</sup>, 6<sup>th</sup>, 8<sup>th</sup> week). Peaks of interests are labeled by red triangles: 904.50, 1060.60, 1227.68, 1374.79, 1475.84, 1576.89 and 1821.99, separately.



Figure S3A

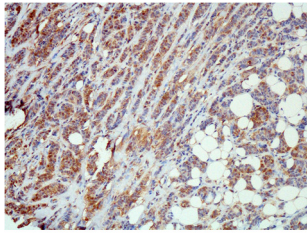

**A1 score: 2+**

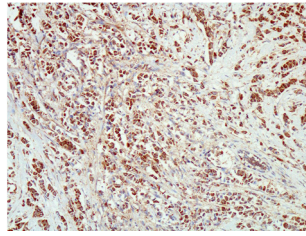

**A2 score: 3+**

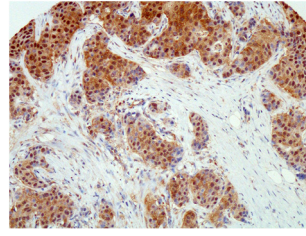

**A3 score: 2+**

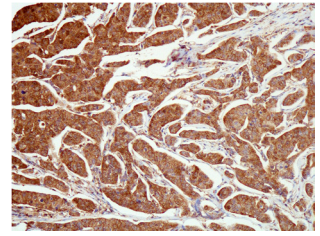

**A4 score: 3+**

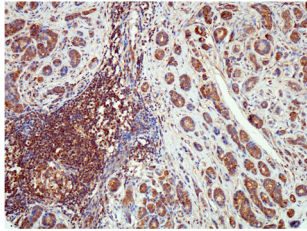

**A5 score: 2+**

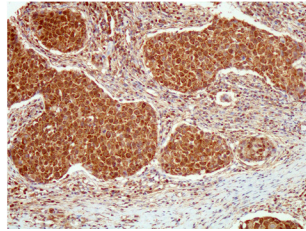

**A6 score: 3+**

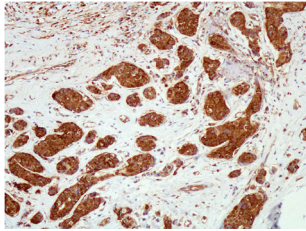

**A7 score: 3+**

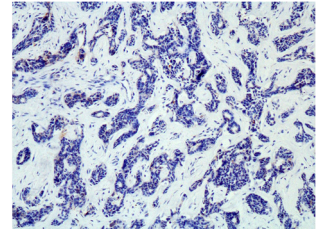

**A8 score: <1**

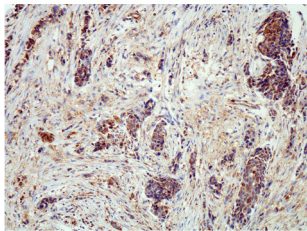

**A9 score: 1+**

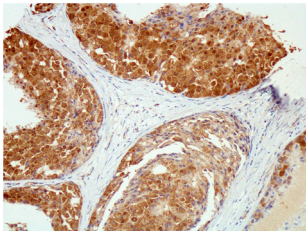

**A10 score: 3+**

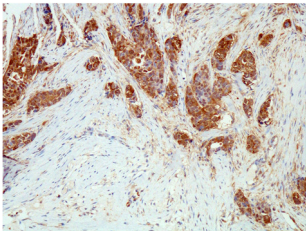

**B1 score: 1+**

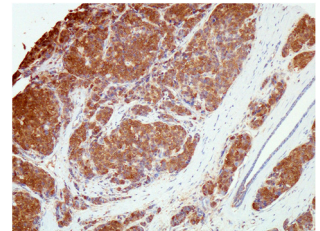

**B2 score: 3+**

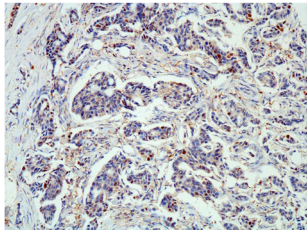

**B3 score: <1**

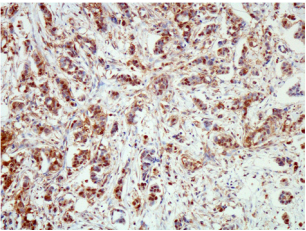

**B4 score: 2+**

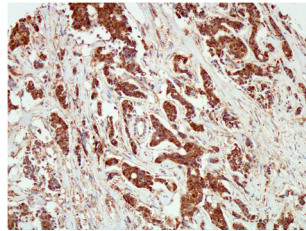

**B5 score: 3+**

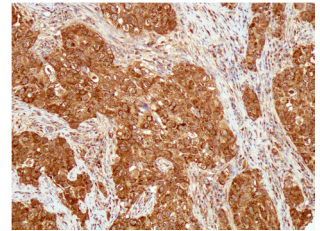

**B7 score: 3+**

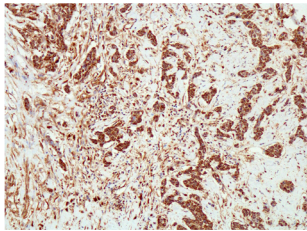

**B8 score: 3+**

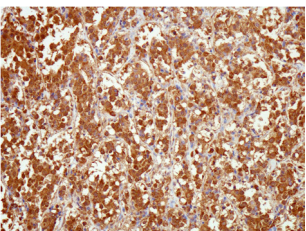

**B9 score: 3+**

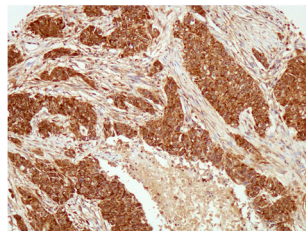

**B10 score: 3+**

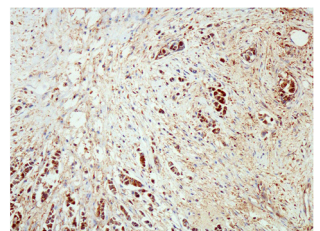

**C1 score: 1+**

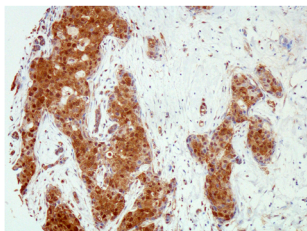

**C2 score: 2+**

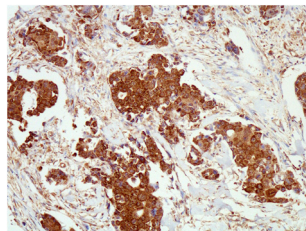

**C3 score: 3+**

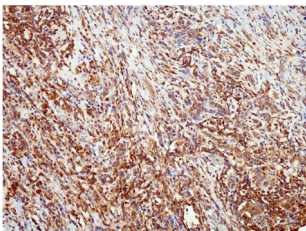

**C4 score: 3+**

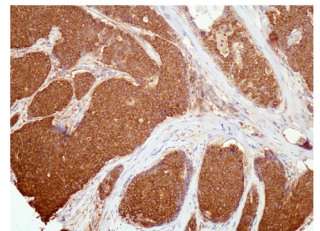

**C5 score: 3+**

Figure S3B

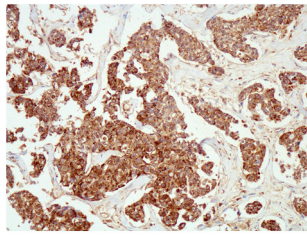

**C6 score: 2+**

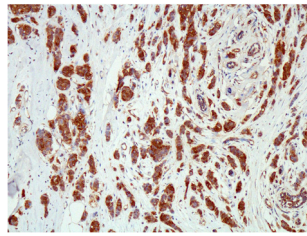

**C7 score: 1+**

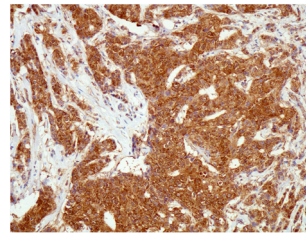

**C8 score: 3+**

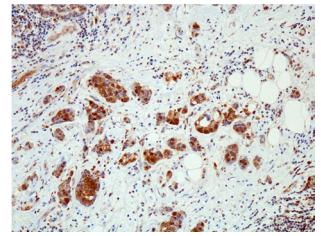

**C9 score: 1+**

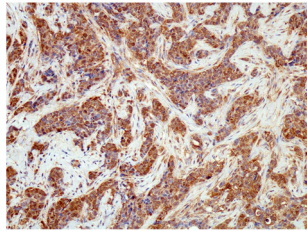

**D10 score: 3+**

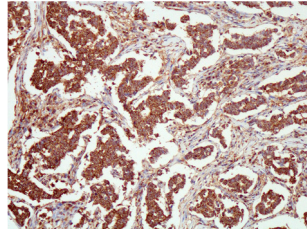

**D1 score: 3+**

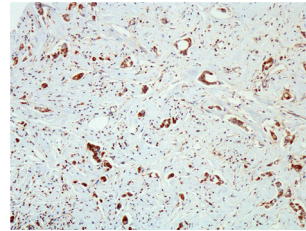

**D2 score: 1+**

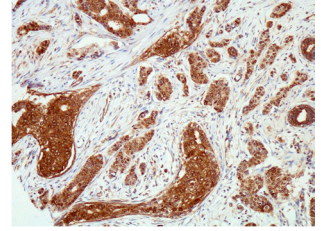

**D3 score: 2+**

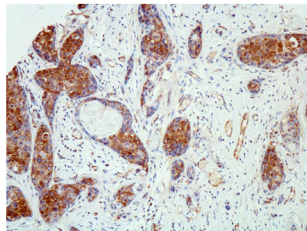

**D4 score: 1+**

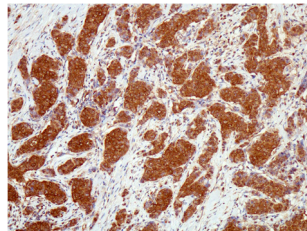

**D5 score: 3+**

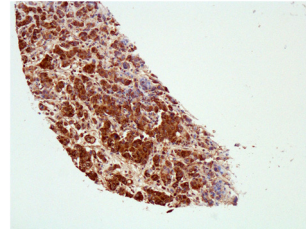

**D6 score: 3+**

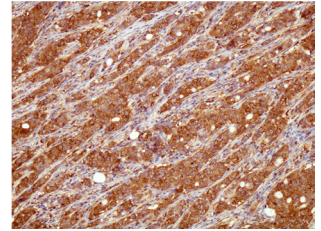

**D7 score: 2+**

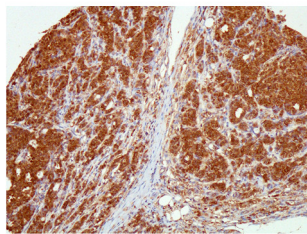

**D8 score: 3+**

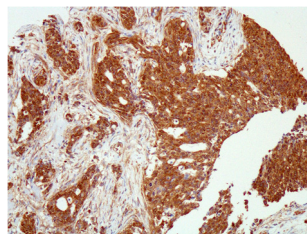

**D9 score: 3+**

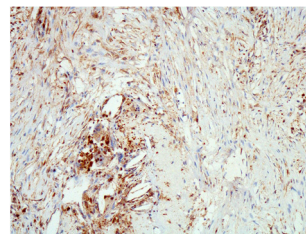

**D10 score: 1+**

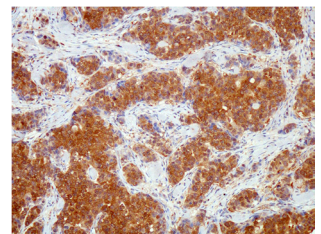

**E1 score: 2+**

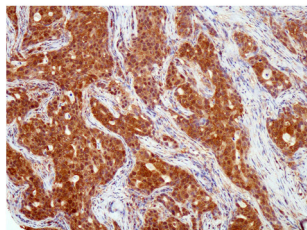

**E2 score: 3+**

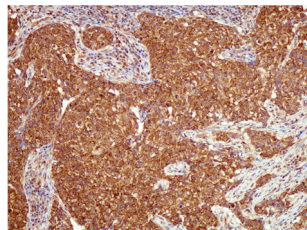

**E3 score: 3+**

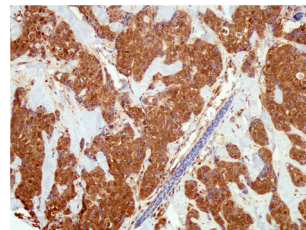

**E4 score: 3+**

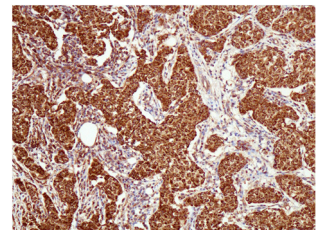

**E5 score: 3+**

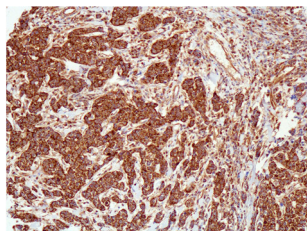

**E7 score: 3+**

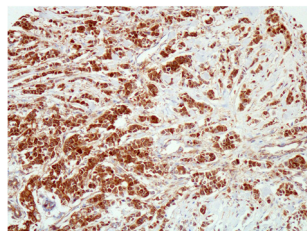

**E8 score: 2+**

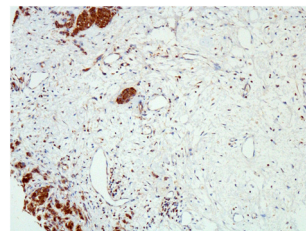

**E9 score: 1+**

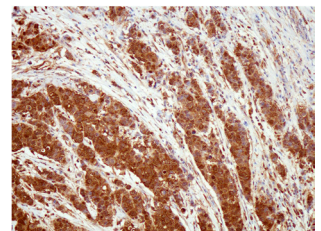

**E10 score: 3+**

Figure S3C

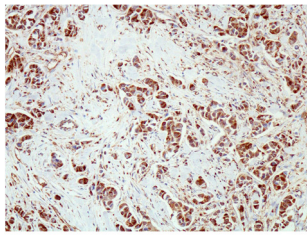

**F1 score: 1+**

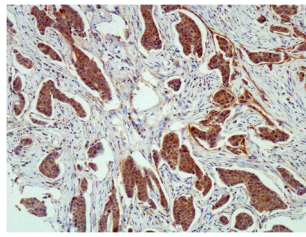

**F2 score: 1+**

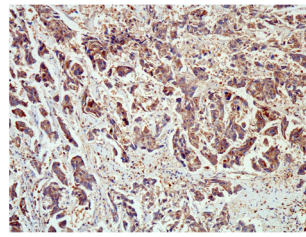

**F3 score: 2+**

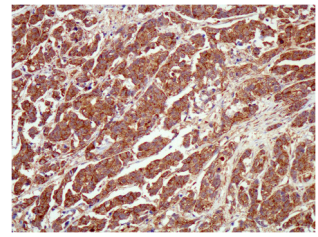

**F4 score: 3+**

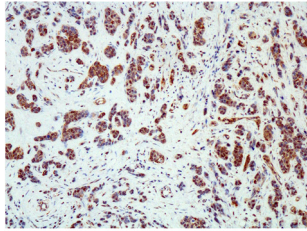

**F5 score: 2+**

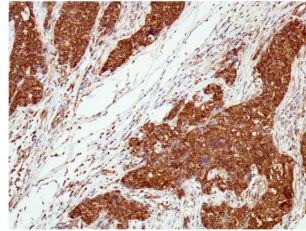

**F6 score: 3+**

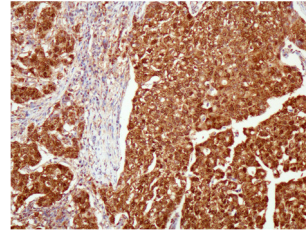

**F7 score: 3+**

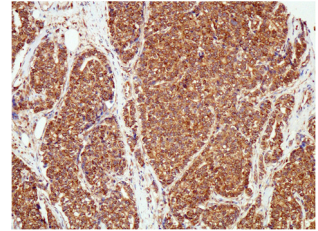

**F8 score: 3+**

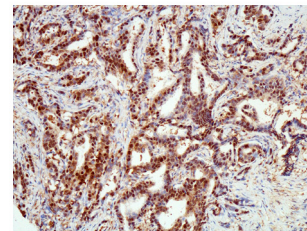

**F9 score: 2+**

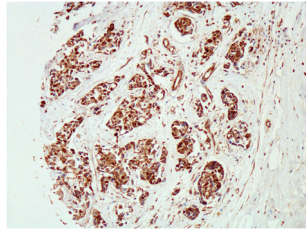

**F10 score: 2+**

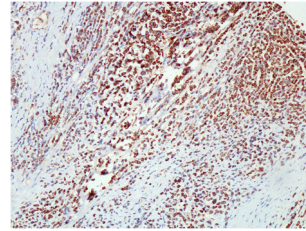

**G1 score: 3+**

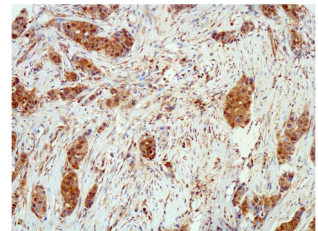

**G2 score: 2+**

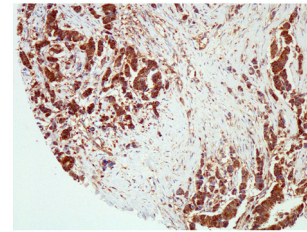

**G3 score: 3+**

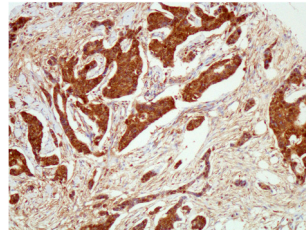

**G4 score: 3+**

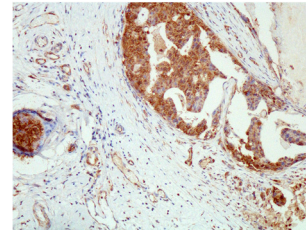

**G5 score: 2+**

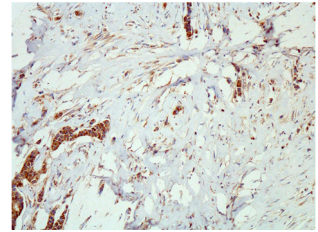

**G6 score: 1+**

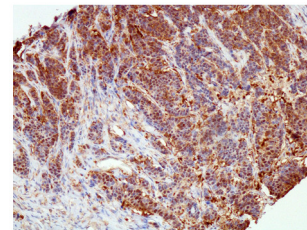

**G7 score: 3+**

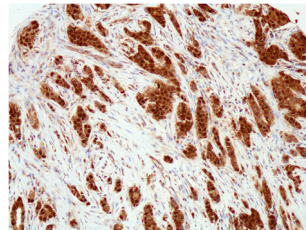

**G8 score: 2+**

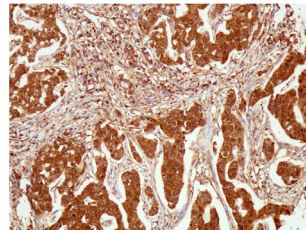

**G9 score: 3+**

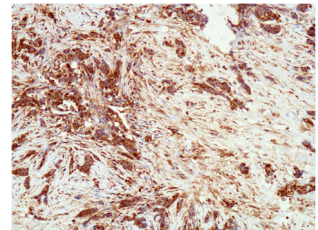

**G10 score: 2+**

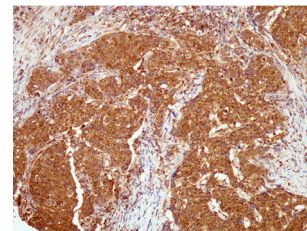

**H1 score: 3+**

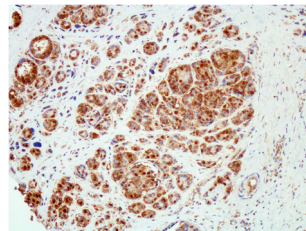

**H2 score: 2+**

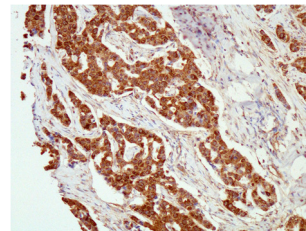

**H3 score: 3+**

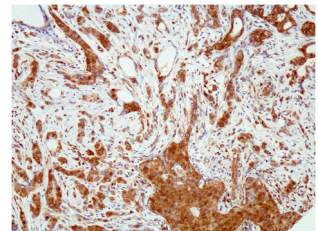

**H4 score: 1+**

Figure S3D

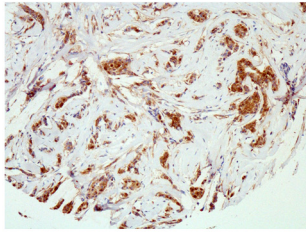

**H5 score: 1+**

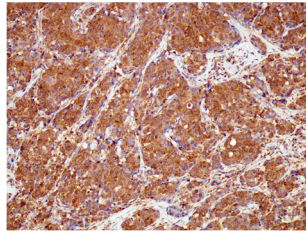

**H6 score: 3+**

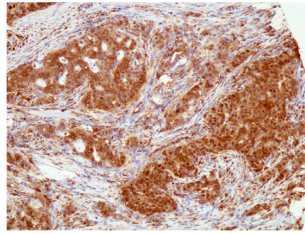

**H7 score: 3+**

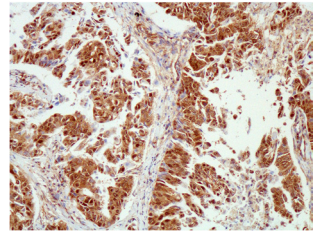

**H8 score: 3+**

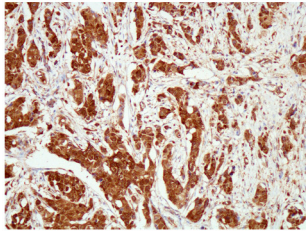

**H9 score: 2+**

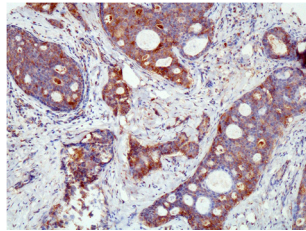

**H10 score: 1+**

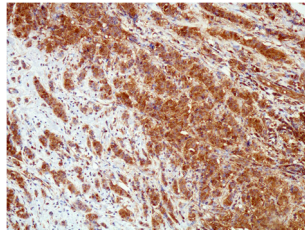

**I1 score: 3+**

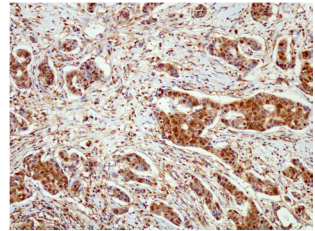

**I2 score: 2+**

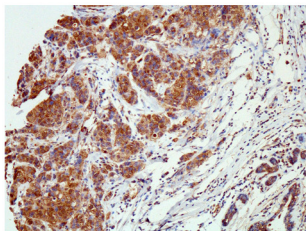

**I3 score: 2+**

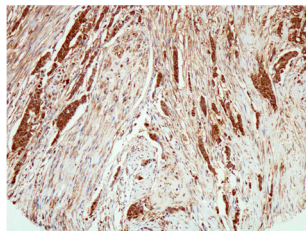

**I4 score: 2+**

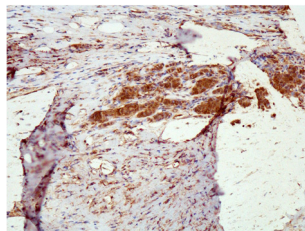

**I5 score: 1+**

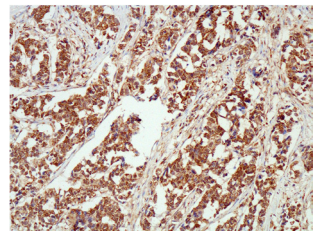

**I6 score: 3+**

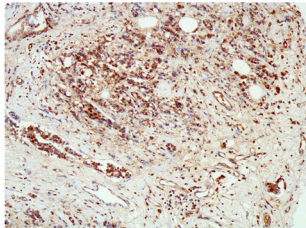

**I7 score: 1+**

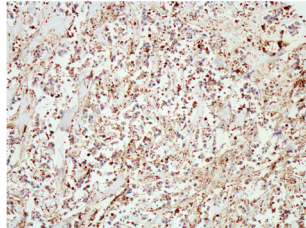

**I8 score: 2+**

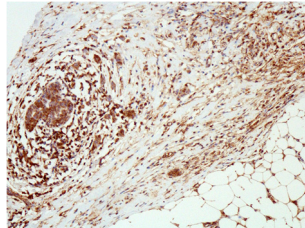

**I9 score: 2+**

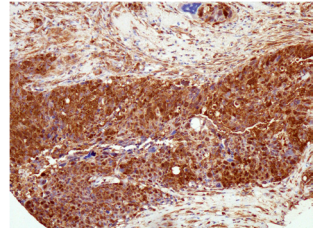

**I10 score: 3+**

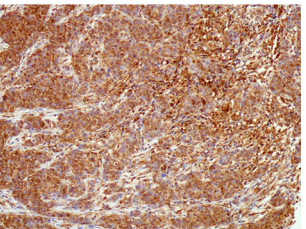

**J1 score: 2+**

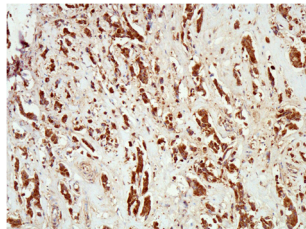

**J2 score: 2+**

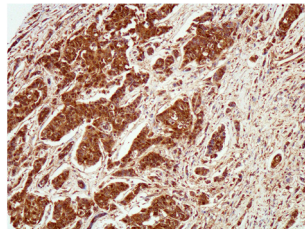

**J3 score: 3+**

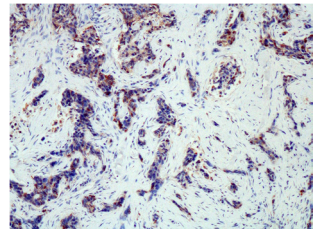

**J4 score: <1**

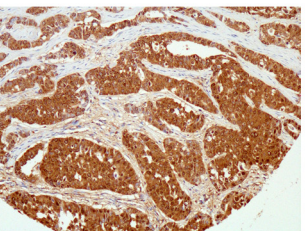

**J5 score: 3+**

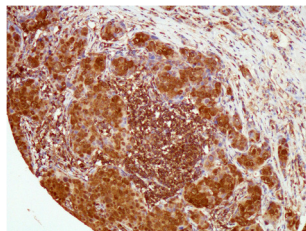

**J6 score: 3+**

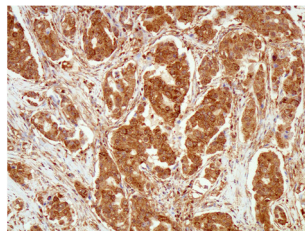

**J7 score: 3+**

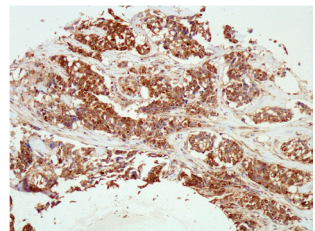

**J8 score: 3+**

Figure S3E

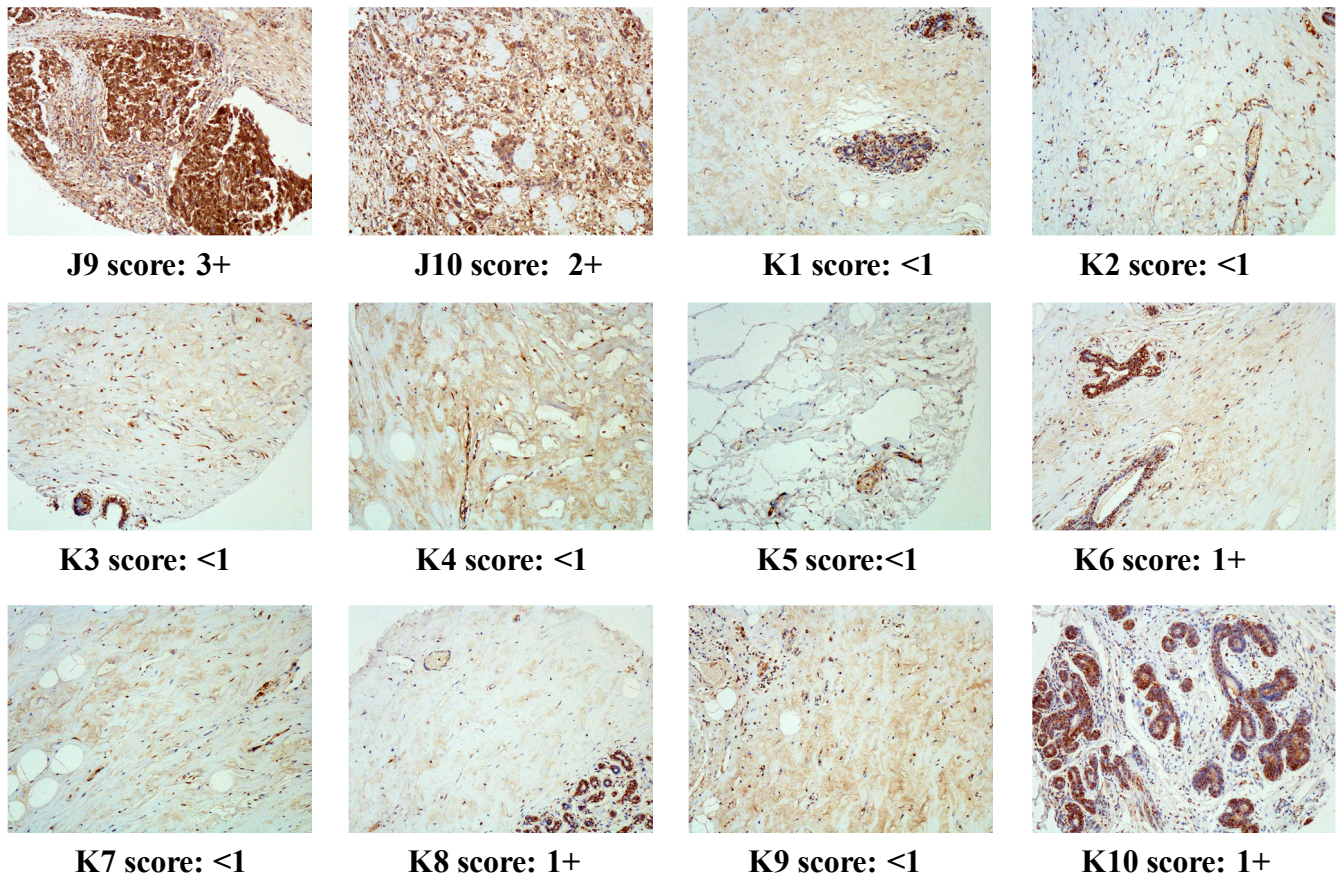

**Figure S3. Immunohistochemistry staining tissue array of CPN in normal breast tissue and tumor tissue in human.**

Tissue array slide contains 110 human breast tissue sections, including 100 breast cancer cases with pathological stage I-III (A1-J10) and 10 adenosis/cancer adjacent normal breast tissues as controls (K1-K10). Section B6 and E6 were missed when purchase. Detail information about the ages, pathology diagnosis, grades, stages and Tumor-Nodes-Metastasis (TNM) grading at <http://www.biomax.us/tissue-arrays/Breast/BC081116a>. This tissue array slide was processed by the same experimental conditions as what we used for the mouse tissue slide (see Materials and Methods). Each section was scored by a scoring system reported by Zhang et al. (31).

Figure S4

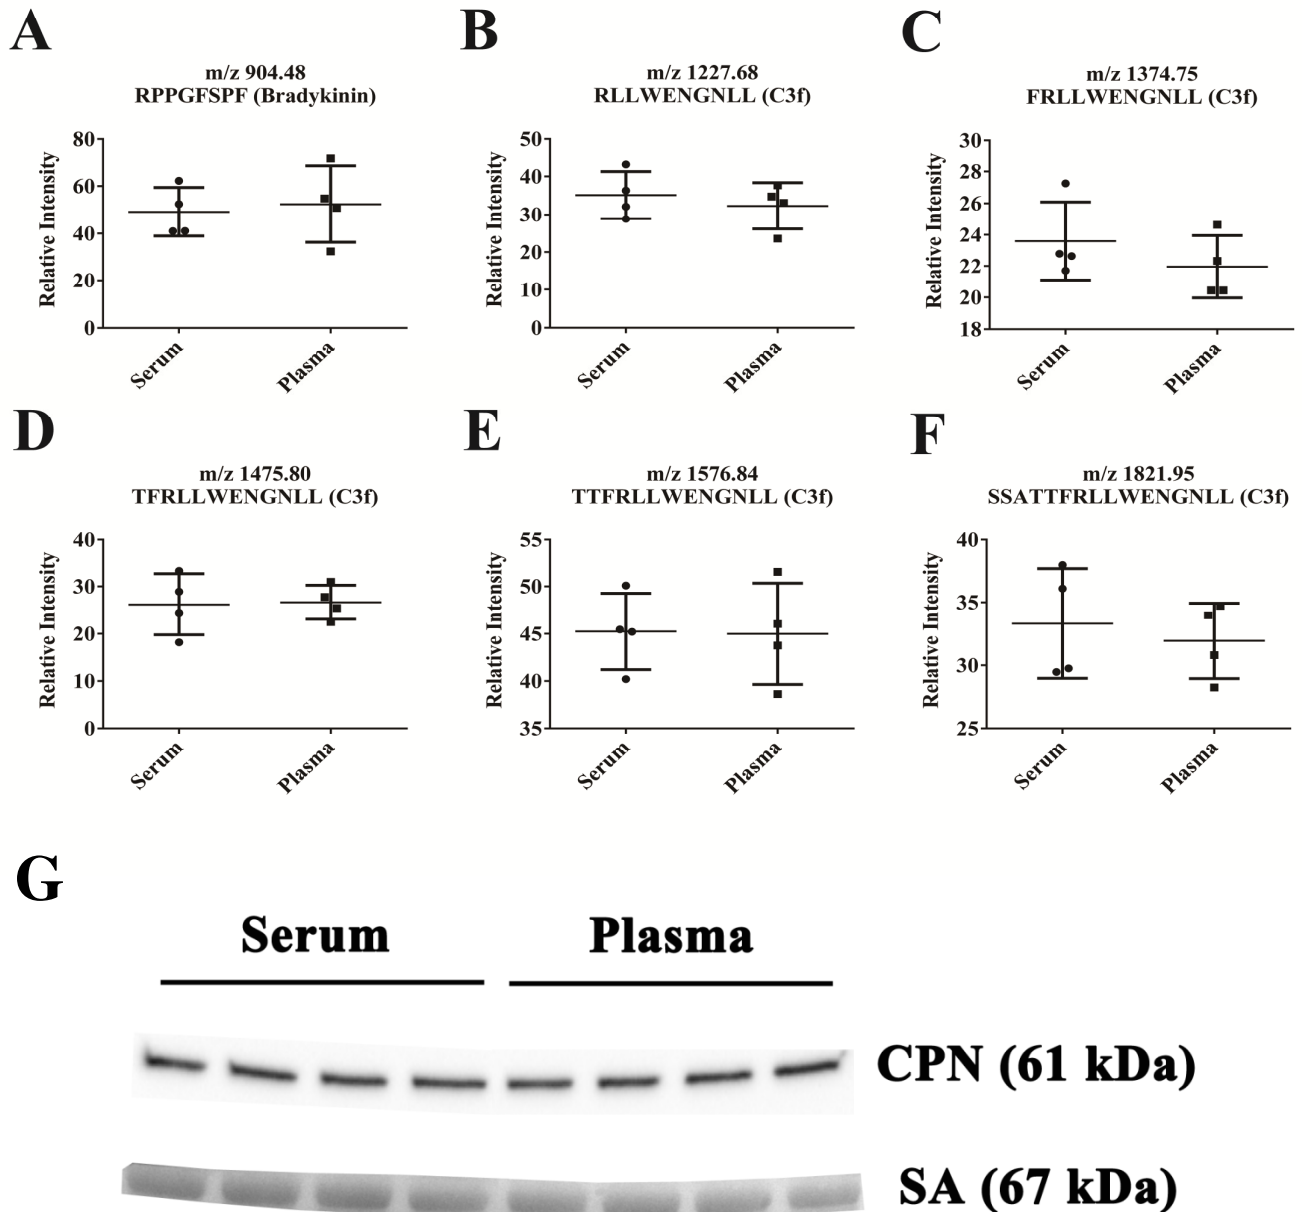

**Figure S4. Comparison of the expression levels of the CPN and CPN-specific peptides in mouse serum and plasma.**

Four normal nude mice (female, 6-8 weeks old) were used. **A-F.** Six CPN-specific peptides were extracted from mouse serum and plasma by nanopore fractionation, and then analyzed by MALDI-TOF MS. **G.** CPN expression by immunoblotting in mouse serum and plasma. Ponceau S-stained serum albumin serves as internal control.
